# Supplementary material for: Immunity after COVID-19 and vaccination: follow-up study over 1 year among medical personnel
Source: Springer Nature journal article supplement (doi:10.1007/s15010-021-01703-9), 2021-09-25
Supplement: MOESM1 [file 19723128]

## Supplementary material

### Immunity after COVID-19 and vaccination: follow-up study over one year among medical personnel

Vivian Glück<sup>1</sup>, Sonja Grobecker<sup>1</sup>, Josef Köstler<sup>1</sup>, Leonid Tydykov<sup>1</sup>, Manuela Bertok<sup>2</sup>, Tanja Weidlich<sup>2</sup>, Christine Gottwald<sup>2</sup>, Bernd Salzberger<sup>3</sup>, Ralf Wagner<sup>1,4</sup>, Florian Zeman<sup>5</sup>, Michael Koller<sup>5</sup>, André Gessner<sup>1,4</sup>, Barbara Schmidt<sup>1,4</sup>, Thomas Glück<sup>2</sup>, David Peterhoff<sup>1,4\*</sup>

<sup>1</sup> Institute for Clinical Microbiology and Hygiene, University Hospital Regensburg, Regensburg, Germany

<sup>2</sup> Kliniken Südostbayern AG, Klinikum Traunstein, Traunstein, Germany

<sup>3</sup> Department for Infection Control and Infectious Diseases, University Hospital Regensburg, Regensburg, Germany

<sup>4</sup> Institute for Medical Microbiology and Hygiene, University of Regensburg, Regensburg, Germany

<sup>5</sup> Center for Clinical Studies, University Hospital Regensburg, Regensburg, Germany

\* Correspondence: [david.peterhoff@ur.de](mailto:david.peterhoff@ur.de)

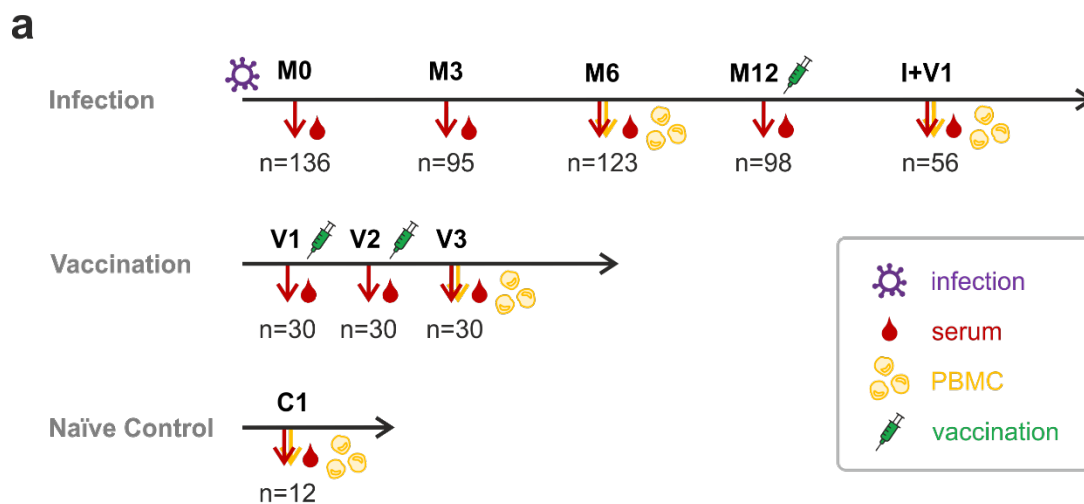

**b**

| visit # | presence/absence at visit |    |    |    |   |   |   |   |   |   | total count participants |     |
|---------|---------------------------|----|----|----|---|---|---|---|---|---|--------------------------|-----|
| M0      | ■                         | ■  | ■  | ■  | ■ | ■ | ■ | ■ | ■ | ■ | ■                        | 136 |
| M3      | ■                         | ■  | ■  | ■  | ■ | ■ | ■ | ■ | ■ | ■ | ■                        | 95  |
| M6      | ■                         | ■  | ■  | ■  | ■ | ■ | ■ | ■ | ■ | ■ | ■                        | 123 |
| M12     | ■                         | ■  | ■  | ■  | ■ | ■ | ■ | ■ | ■ | ■ | ■                        | 98  |
| I+V1    | ■                         | ■  | ■  | ■  | ■ | ■ | ■ | ■ | ■ | ■ | ■                        | 56  |
| count   | 32                        | 30 | 12 | 19 | 9 | 9 | 8 | 3 | 9 | 4 | 1                        |     |

present at visit  
 absent at visit

**Fig. S1: Sampling protocol and number of participants at each time point.** (a) Sampling timelines and sampling material for the COVID-19 convalescent group (“Infection”), control group of SARS-CoV-2 naïve vaccinees (“Vaccination”) and control group of SARS-CoV-2 naïve subjects (“Naïve control”), respectively. (b) Table summarizing the counts of the combination of presences during the five study visits of the COVID-19 convalescent group. M0: sample 3 weeks (median) after onset of symptoms; M3: sample 12 weeks (median) after onset of symptoms; M6: sample 30 weeks (median) after onset of symptoms; M12: sample 48 weeks (median) after onset of symptoms; I+V1: sample 42 (median) days after vaccination; V1: sample before first vaccination; V2: sample before second vaccination; V3: sample 15 days (median) after second vaccination.
